# Supplementary material for: Polyimide with enhanced π stacking for efficient visible-light-driven photocatalysis
Source: Royal Society of Chemistry journal article supplement (doi:10.1039/d1cy00581b), 2021-01-01
Supplement: d1cy00581b1.pdf [file d1cy00581b1.pdf]

## Supporting Information

### Polyimide with enhanced $\pi$ stacking for efficient visible-light-driven photocatalysis

Kelian Zhang,<sup>a</sup> Hanmei Li,<sup>a</sup> Haixian Shi<sup>a</sup> and Wei Hong<sup>\*a</sup>

a. Key Laboratory for Polymeric Composite and Functional Materials of Ministry of Education, Guangdong Engineering Technology Research Center for High-performance Organic and Polymer Photoelectric Functional Films, School of Chemistry, Sun Yat-sen University, Guangzhou 510275, P. R. China.

\*E-mail: [hongwei9@mail.sysu.edu.cn](mailto:hongwei9@mail.sysu.edu.cn).

#### Contents Page

|                                                                                                                                                                                                                                    |    |
|------------------------------------------------------------------------------------------------------------------------------------------------------------------------------------------------------------------------------------|----|
| <b>Figure S1</b> FT-IR spectra of 6DMPI, MAPI and PI-S.....                                                                                                                                                                        | 2  |
| <b>Figure S2</b> XPS spectra of 6DMPI, MAPI and PI-S. ....                                                                                                                                                                         | 2  |
| <b>Figure S3</b> Solid-state <sup>13</sup> C NMR spectra of 6DEPI, PI-S 6DMPI and <sup>13</sup> C NMR spectra of glycol. ....                                                                                                      | 3  |
| <b>Figure S4</b> SEM images of 6DEPI, 6DMPI, MAPI, PI-S and g-C <sub>3</sub> N <sub>4</sub> . ....                                                                                                                                 | 4  |
| <b>Figure S5</b> TEM images of 6DMPI, MAPI, PI-S and g-C <sub>3</sub> N <sub>4</sub> . ....                                                                                                                                        | 5  |
| <b>Figure S6</b> Tauc plots and the apparent band gaps of pristine g-C <sub>3</sub> N <sub>4</sub> , PI-S, MAPI, 6DMPI and 6DEPI, CVs of 6DMPI, 6DEPI, MAPI, PI-S and Mott-Schottky plots of g-C <sub>3</sub> N <sub>4</sub> ..... | 5  |
| <b>Figure S7</b> VB-XPS spectrum of pristine g-C <sub>3</sub> N <sub>4</sub> ,PI-S,MAPI, 6DMPI and 6DEPI. ....                                                                                                                     | 6  |
| <b>Figure S8</b> HOMO and LUMO orbitals of the geometry-optimized PI model.....                                                                                                                                                    | 7  |
| <b>Figure S9</b> Time-resolved PL spectra of g-C <sub>3</sub> N <sub>4</sub> , PI-S, MAPI, 6DMPI and 6DEPI.....                                                                                                                    | 7  |
| <b>Figure S10</b> The HER of 6DEPI with different mass ratios of Pt.....                                                                                                                                                           | 8  |
| <b>Figure S11</b> The XPS spectra of 6DEPI after photocatalytic tests .....                                                                                                                                                        | 9  |
| <b>Figure S12</b> FT-IR spectra of 6DEPI before and after HER reactions. ....                                                                                                                                                      | 9  |
| <b>Figure S13</b> TEM images of 6DEPI-Pt and EDS images of 6DEPI-Pt. ....                                                                                                                                                          | 10 |
| <b>Figure S14</b> HER of different PI-based photocatalysts. ....                                                                                                                                                                   | 11 |
| <b>Figure S15</b> The photocatalytic oxygen evolution with 6DEPI.....                                                                                                                                                              | 13 |
| <b>Figure S16</b> DMPO spin-trapping ESR spectra for DMPO-HO• produced by 6DEPI.....                                                                                                                                               | 14 |
| <b>Figure S17</b> The Raman spectra of 6DEPI before and after H <sub>2</sub> O <sub>2</sub> evolution.....                                                                                                                         | 14 |
| <b>Table S1</b> Elemental analysis result of atomic contents of the PI-based photocatalysts and g-C <sub>3</sub> N <sub>4</sub> . ....                                                                                             | 3  |
| <b>Table S2</b> The measured lifetime of g-C <sub>3</sub> N <sub>4</sub> , MAPI, 6DMPI and 6DEPI, respectively. ....                                                                                                               | 8  |
| <b>Table S3</b> Hydrogen evolution rate (HER) comparison of PI-based photocatalysts.....                                                                                                                                           | 11 |

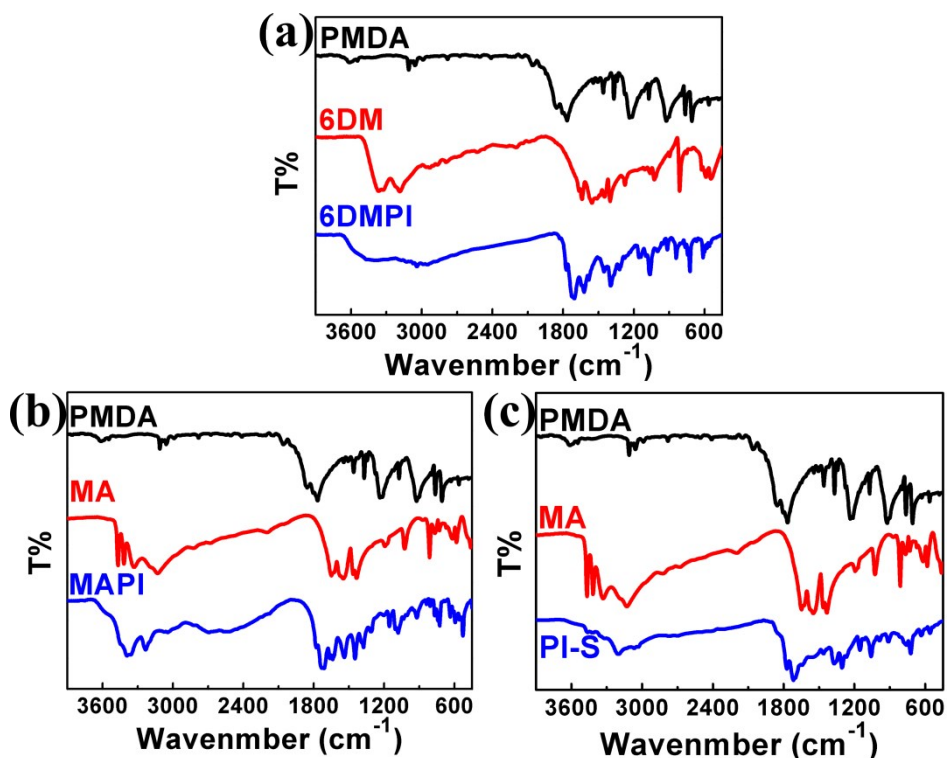

Figure S1 FT-IR spectra of (a) 6DMPI, (b) MAPI and (c) PI-S

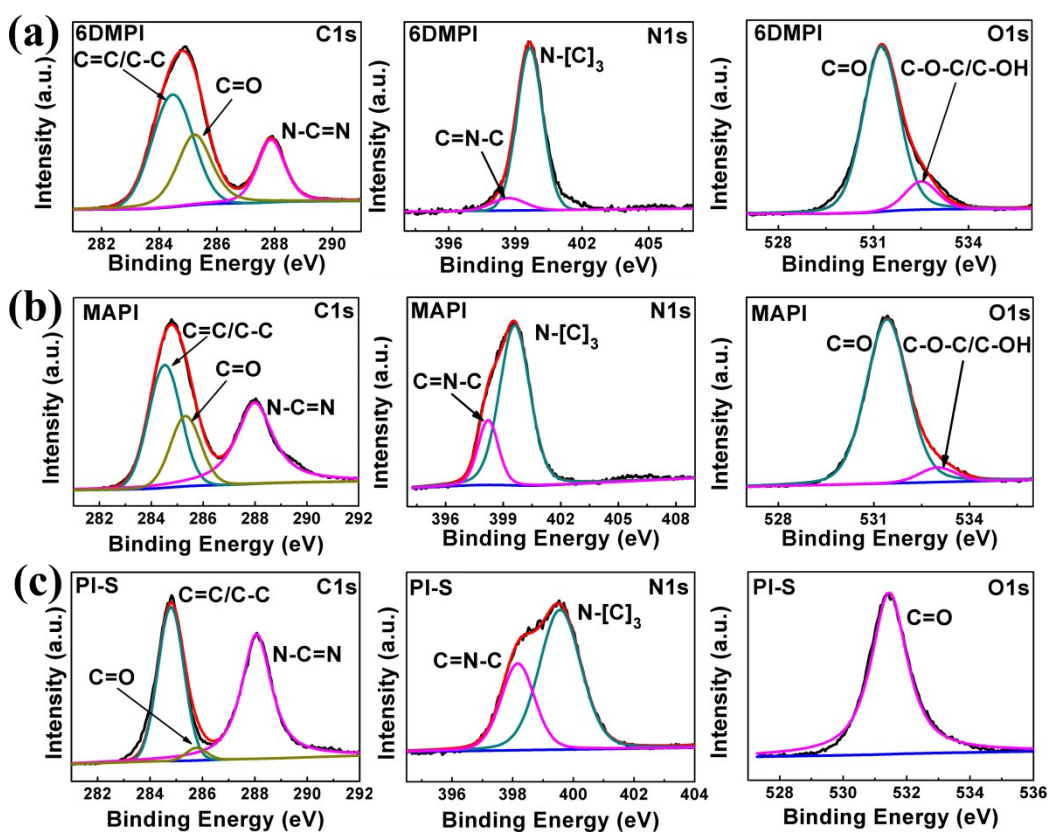

Figure S2 XPS spectra of (a) 6DMPI, (b) MAPI, (c) PI-S.

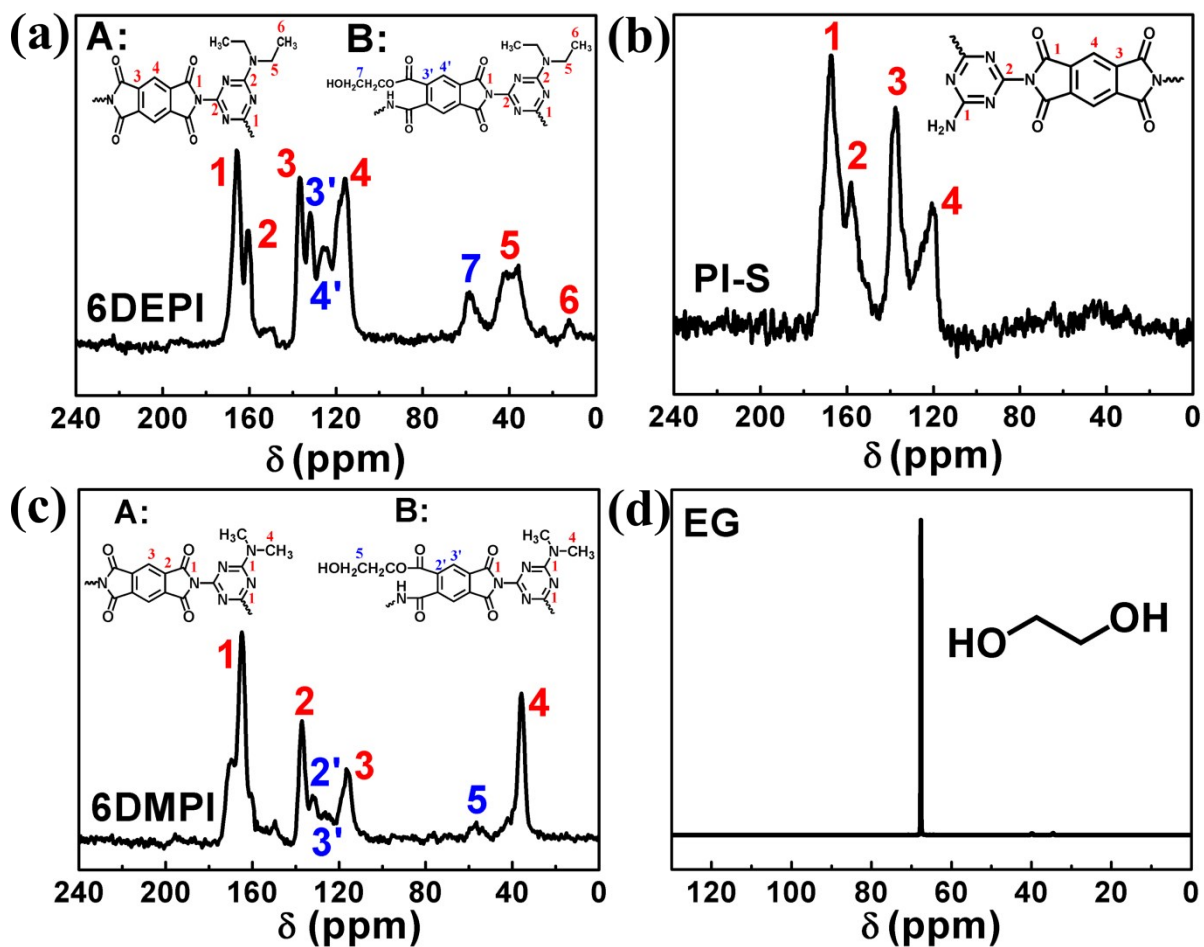

**Figure S3** (a), (b), (c) Solid-state  $^{13}\text{C}$  NMR spectra of 6DEPI, PI-S and 6DMPI, respectively. (d)  $^{13}\text{C}$  NMR spectra of glycol in DMF.

**Table S1** Elemental analysis result of atomic contents of the PI-based photocatalysts and g-C<sub>3</sub>N<sub>4</sub>.

| Sample                          | C%    | N%    | H%   | C/N ratio | C/H ratio |
|---------------------------------|-------|-------|------|-----------|-----------|
| 6DEPI                           | 56.98 | 12.94 | 4.02 | 4.40      | 14.17     |
| 6DMPI                           | 54.70 | 12.93 | 3.65 | 4.23      | 14.99     |
| MAPI                            | 42.63 | 32.48 | 3.26 | 1.31      | 13.08     |
| PI-S                            | 48.97 | 23.57 | 2.14 | 2.08      | 22.94     |
| g-C <sub>3</sub> N <sub>4</sub> | 36.36 | 58.85 | 4.79 | 0.62      | 7.59      |

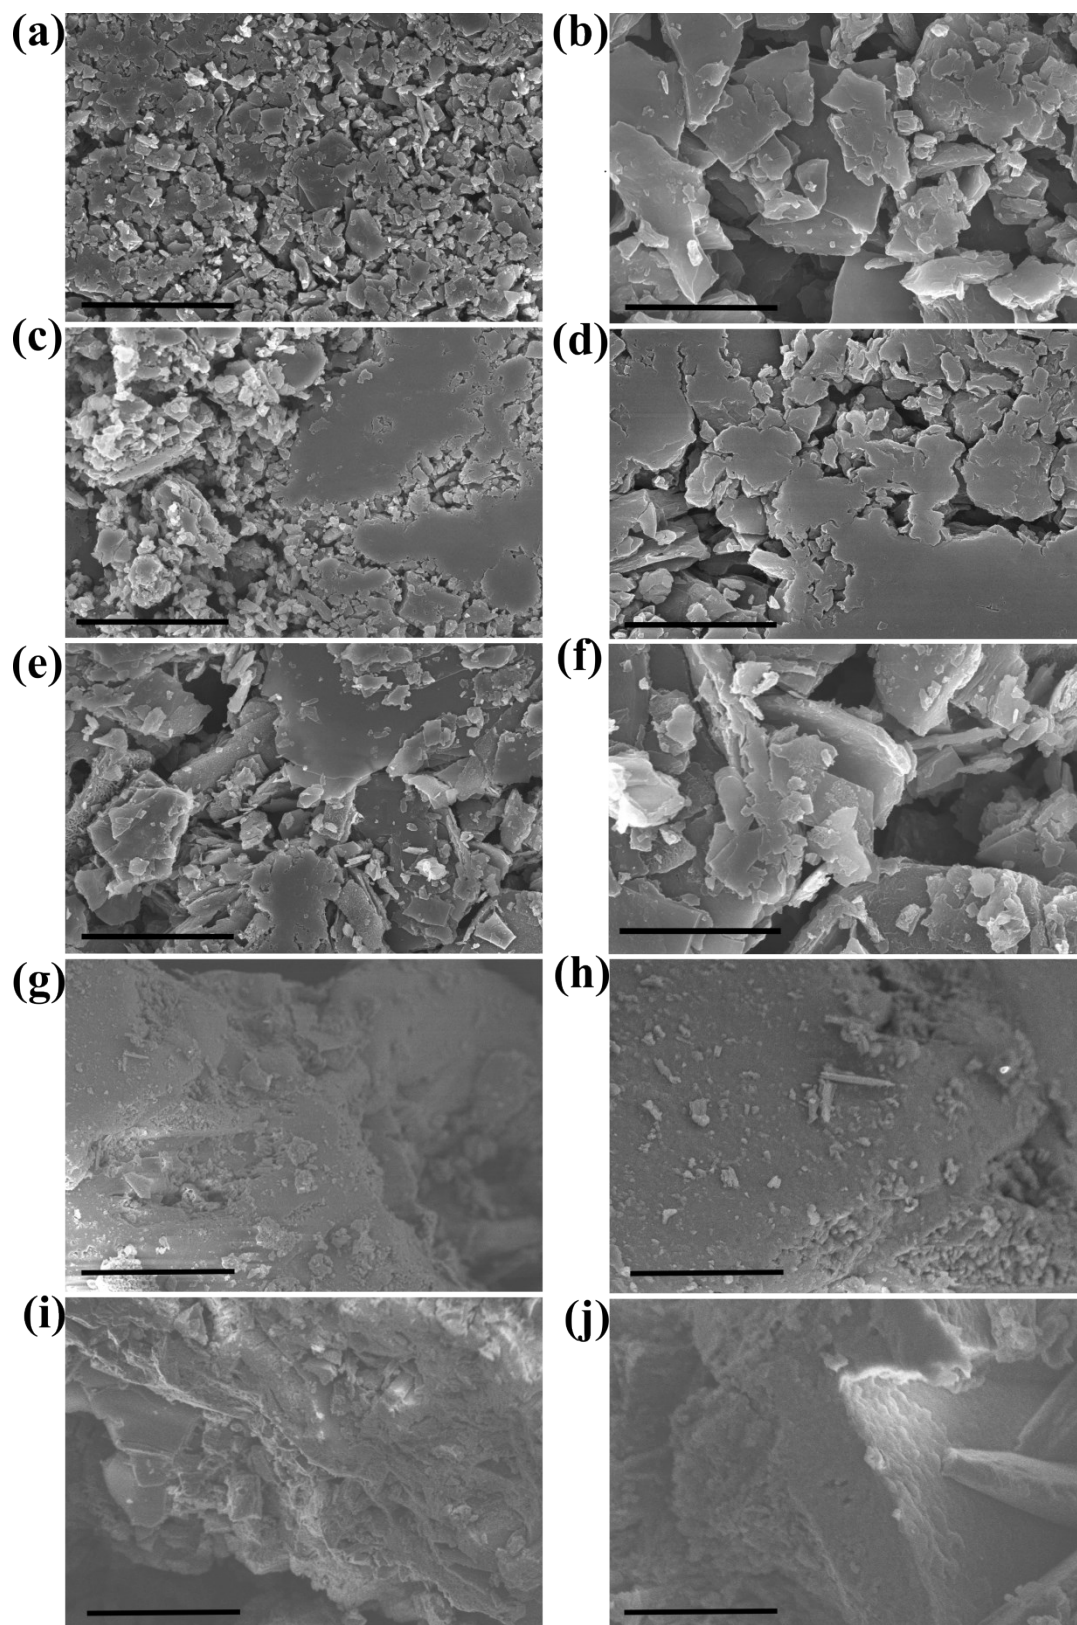

**Figure S4** (a), (b) SEM images of 6DEPI, scale bar: 20  $\mu\text{m}$ , 5  $\mu\text{m}$ , respectively. (c), (d) SEM images of 6DMPI, scale bar: 20  $\mu\text{m}$ , 5  $\mu\text{m}$ , respectively. (e), (f) SEM images of MAPI, scale bar: 20  $\mu\text{m}$ , 5  $\mu\text{m}$ , respectively. (g), (h) SEM images of PI-S, scale bar: 20  $\mu\text{m}$ , 5  $\mu\text{m}$ , respectively. (i), (j) SEM images of g-C<sub>3</sub>N<sub>4</sub>, scale bar: 20  $\mu\text{m}$ , 5  $\mu\text{m}$ , respectively.

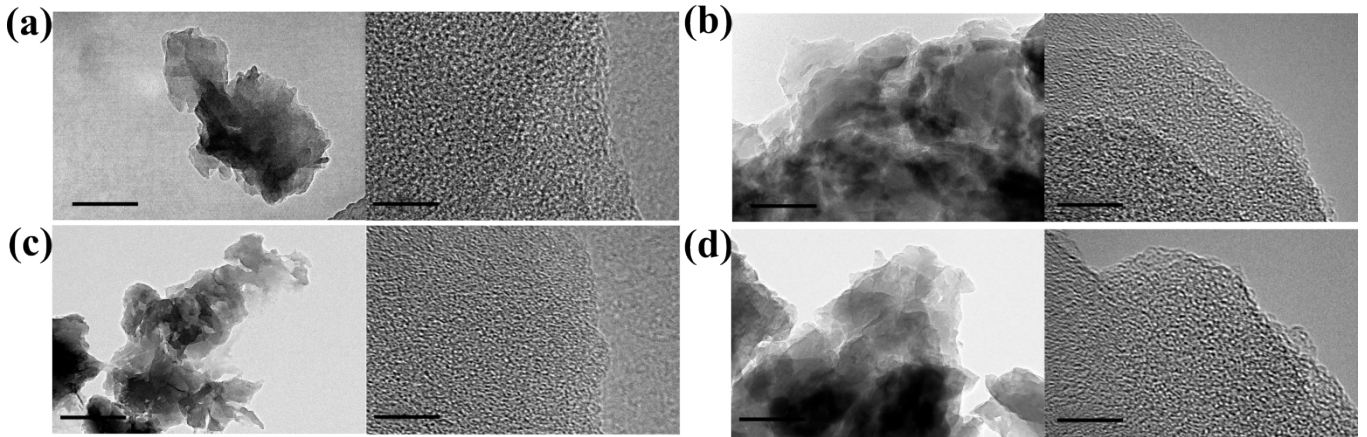

**Figure S5** (a) TEM images of 6DMPI, scale bar: 100 nm and 5 nm, respectively. (b) TEM images of MAPI, scale bar: 100 nm and 5 nm, respectively. (c) TEM images of PI-S, scale bar: 100 nm and 5 nm, respectively. (d) TEM images of  $g\text{-C}_3\text{N}_4$ , scale bar: 100 nm and 5 nm, respectively.

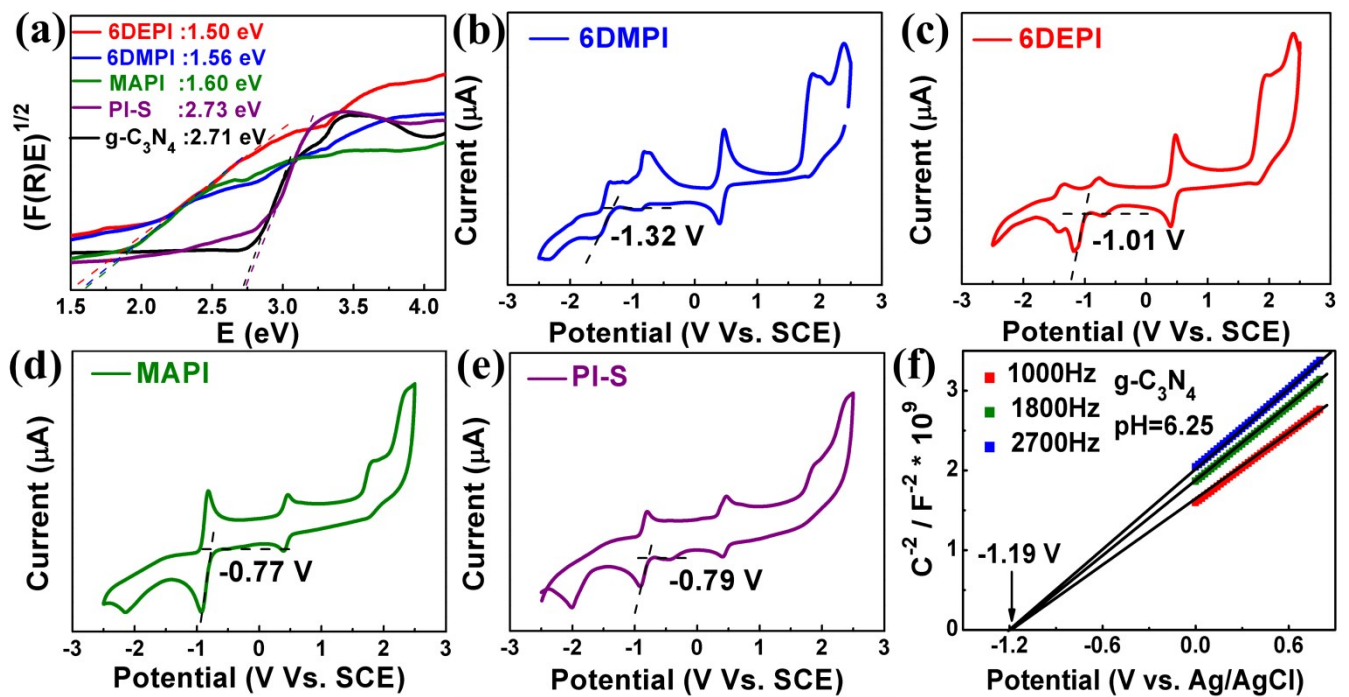

**Figure S6** (a) Tauc plots and the apparent band gaps of pristine  $g\text{-C}_3\text{N}_4$ , PI-S, MAPI, 6DMPI and 6DEPI, based on the Kubelka-Munk formula according to the results of UV-vis DRS spectrum. (b), (c), (d) and (e) CVs of 6DMPI, 6DEPI, MAPI and PI-S, respectively. (The weak anodic peak appears at 0.46 V and the corresponding cathodic peak at 0.39 V are the oxidation and reduction potential of  $\text{Fc}/\text{Fc}^+$ .) (f) Mott-Schottky plots of  $g\text{-C}_3\text{N}_4$ . The  $E_{\text{CB}}$  values of  $g\text{-C}_3\text{N}_4$  were estimated by  $E_{\text{CB}}(\text{vs. NHE}) = E_{\text{red}}(\text{vs. Ag/AgCl}) + 0.197 \text{ V}$ , the  $E_{\text{VB}} = E_{\text{g}} - E_{\text{CB}}$ . The  $E_{\text{CB}}$  values of 6DEPI, 6DMPI, MAPI and PI-S was estimated by  $E_{\text{CB}}(\text{vs. NHE}) = E_{\text{red}}(\text{vs. SCE}) + 0.24 \text{ V}$ .

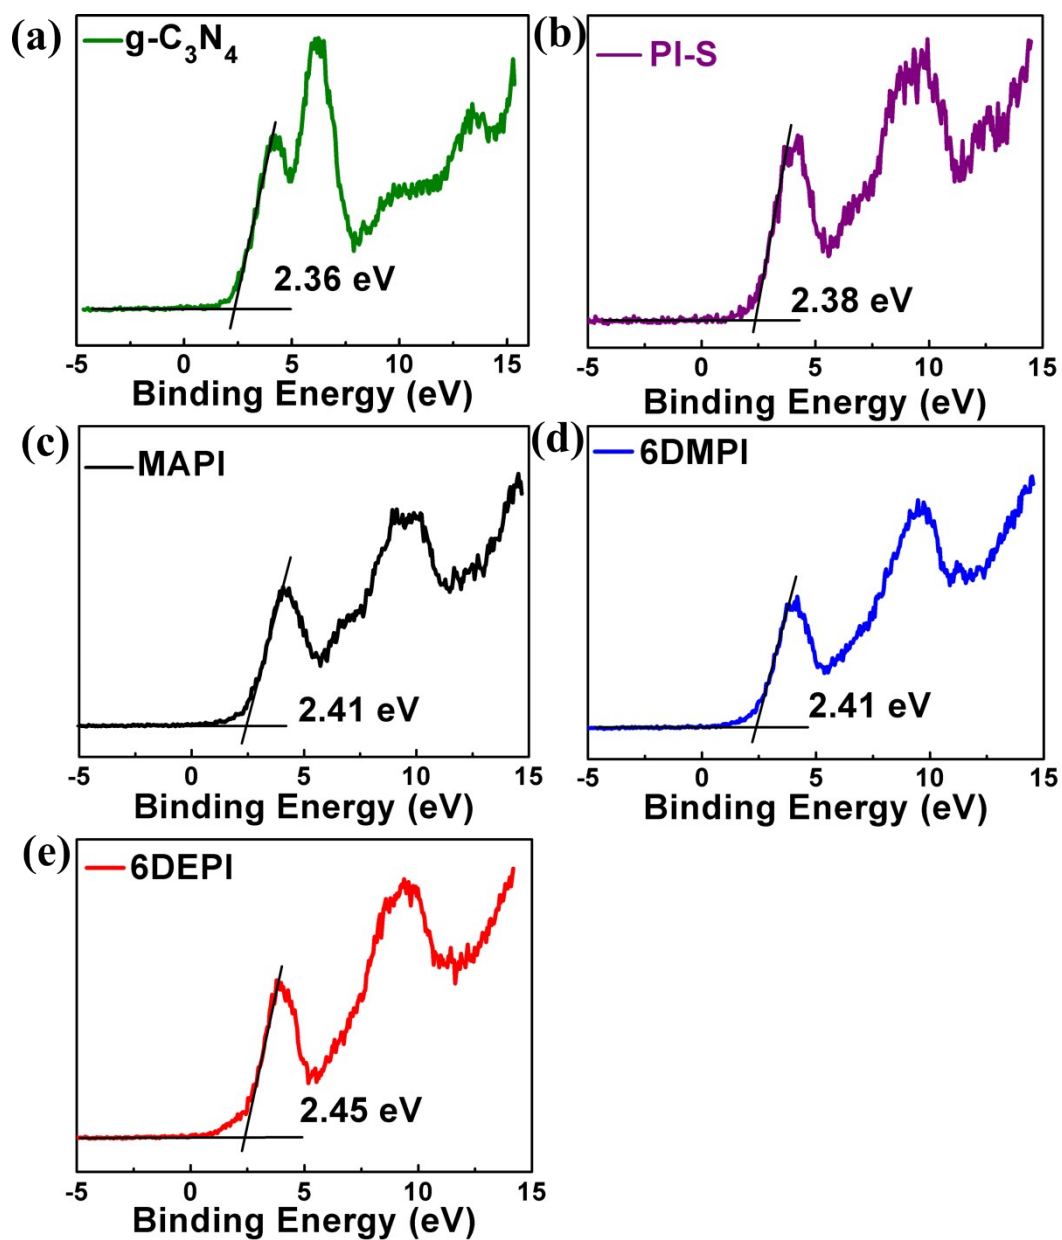

**Figure S7** (a), (b), (c),(d) and (e) VB-XPS spectrum of pristine  $g\text{-C}_3\text{N}_4$ , PI-S, MAPI, 6DMPI and 6DEPI, respectively.

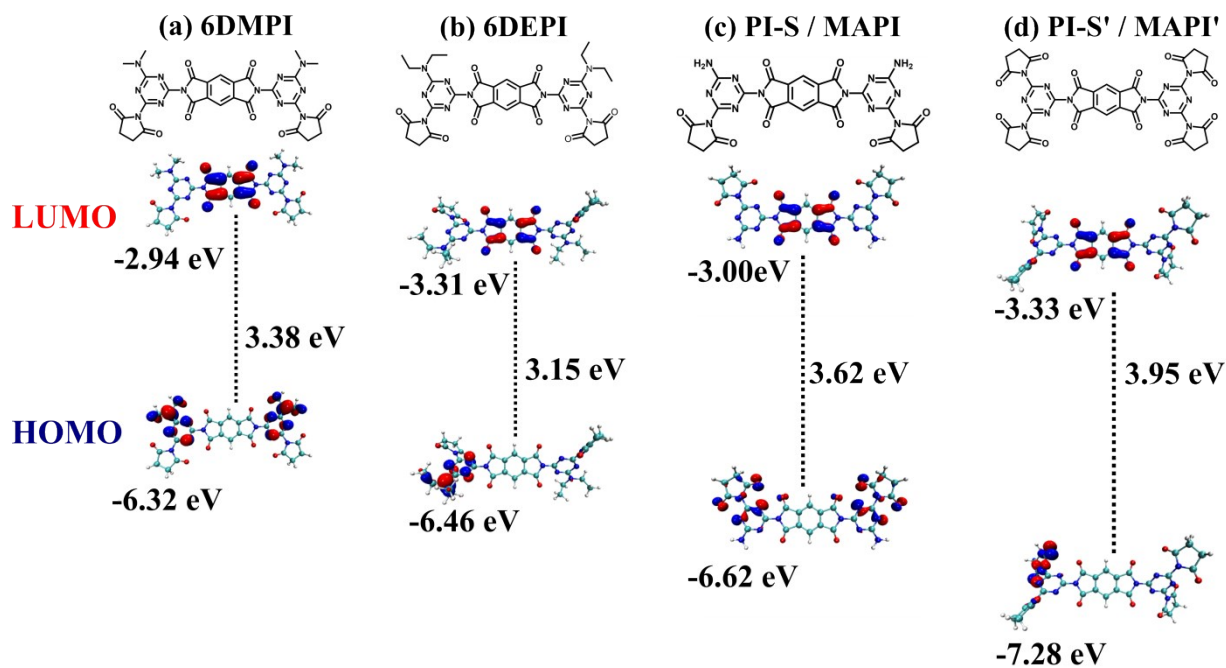

**Figure S8** HOMO and LUMO orbitals of the geometry-optimized PI model, (a) 6DMPI, (b) 6DEPI, (c) PI-S/MAPI and (d) PI-S'/MAPI' (crosslinked), respectively.

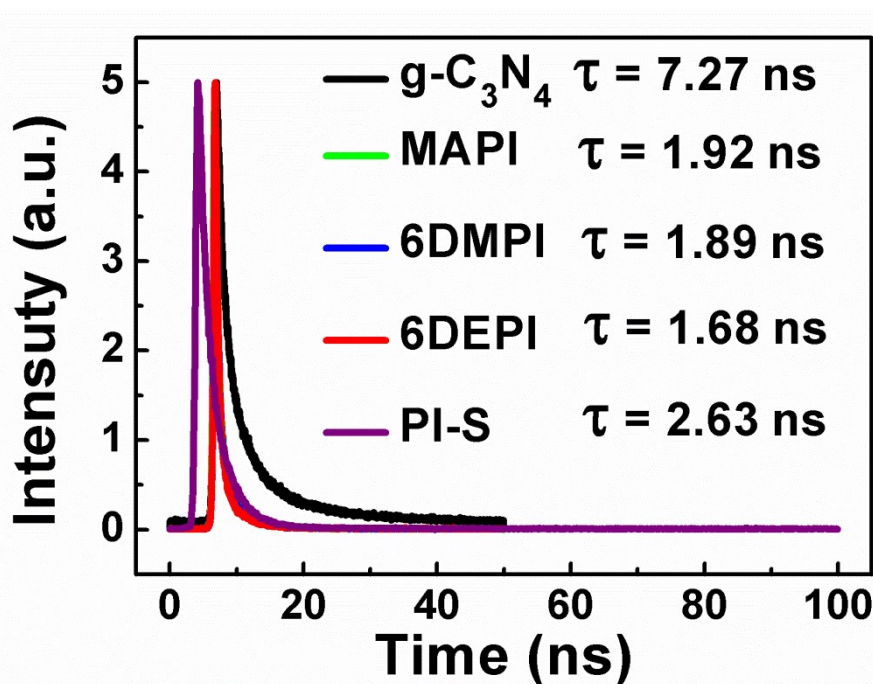

**Figure S9** Time-resolved PL spectra of g-C<sub>3</sub>N<sub>4</sub>, PI-S, MAPI, 6DMPI and 6DEPI, respectively, monitored at 470, 550, 580 and 580 nm, respectively, under 406 nm excitation at 298 K.

**Table S2** The measured lifetime of g-C<sub>3</sub>N<sub>4</sub>, MAPI, 6DMPI and 6DEPI, respectively. The average lifetime was calculated using equation:  $\tau = (A_1\tau_1 + A_2\tau_2 + A_3\tau_3)$

| Sample                          | $\tau_1$ [ns] | $A_1$ [%] | $\tau_2$ [ns] | $A_2$ [%] | $\tau_3$ [ns] | $A_3$ [%] |
|---------------------------------|---------------|-----------|---------------|-----------|---------------|-----------|
| g-C <sub>3</sub> N <sub>4</sub> | 0.96          | 15.18     | 3.60          | 45.04     | 14.00         | 39.77     |
| PI-S                            | 1.58          | 50.15     | 3.69          | 49.85     |               |           |
| MAPI                            | 0.41          | 36.52     | 2.02          | 46.27     | 4.87          | 17.21     |
| 6DMPI                           | 0.51          | 52.51     | 3.07          | 47.49     |               |           |
| 6DEPI                           | 0.48          | 52.09     | 2.99          | 47.91     |               |           |

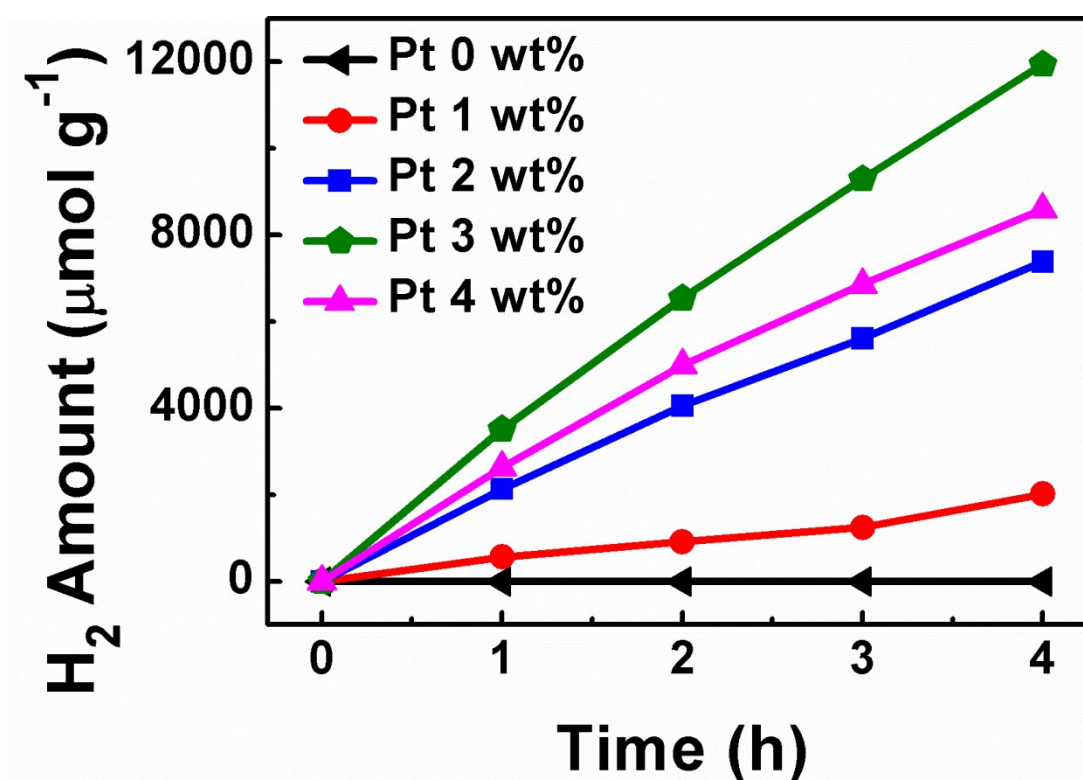

**Figure S10** The HER of 6DEPI with different mass ratios of Pt.



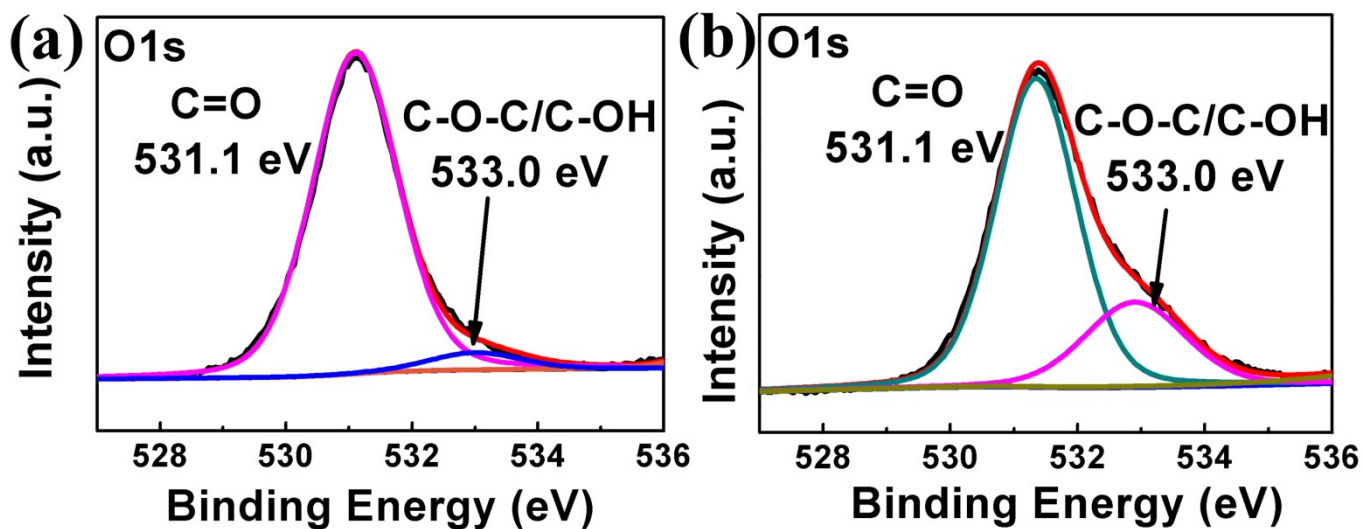

**Figure S11** (a) The O1s XPS spectra of 6DEPI before hydrogen evolution tests, (b) The O1s XPS spectra of 6DEPI after hydrogen evolution tests.

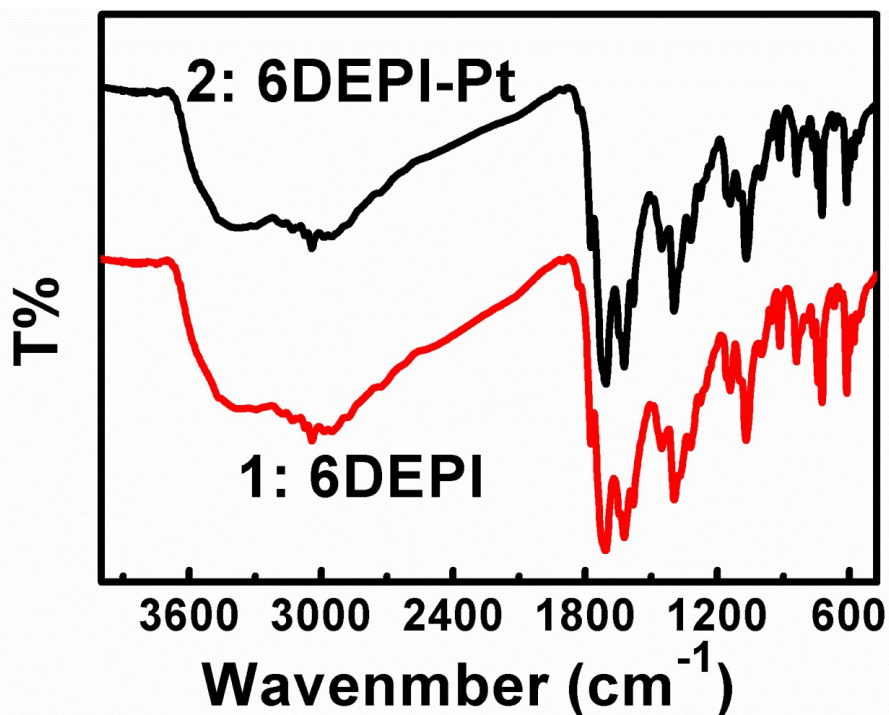

**Figure S12** 1, FT-IR spectra of 6DEPI before HER reactions. 2, FT-IR spectra of 6DEPI after HER reactions, named as 6DEPI-Pt. The mass ratios of Pt was 3 wt%.

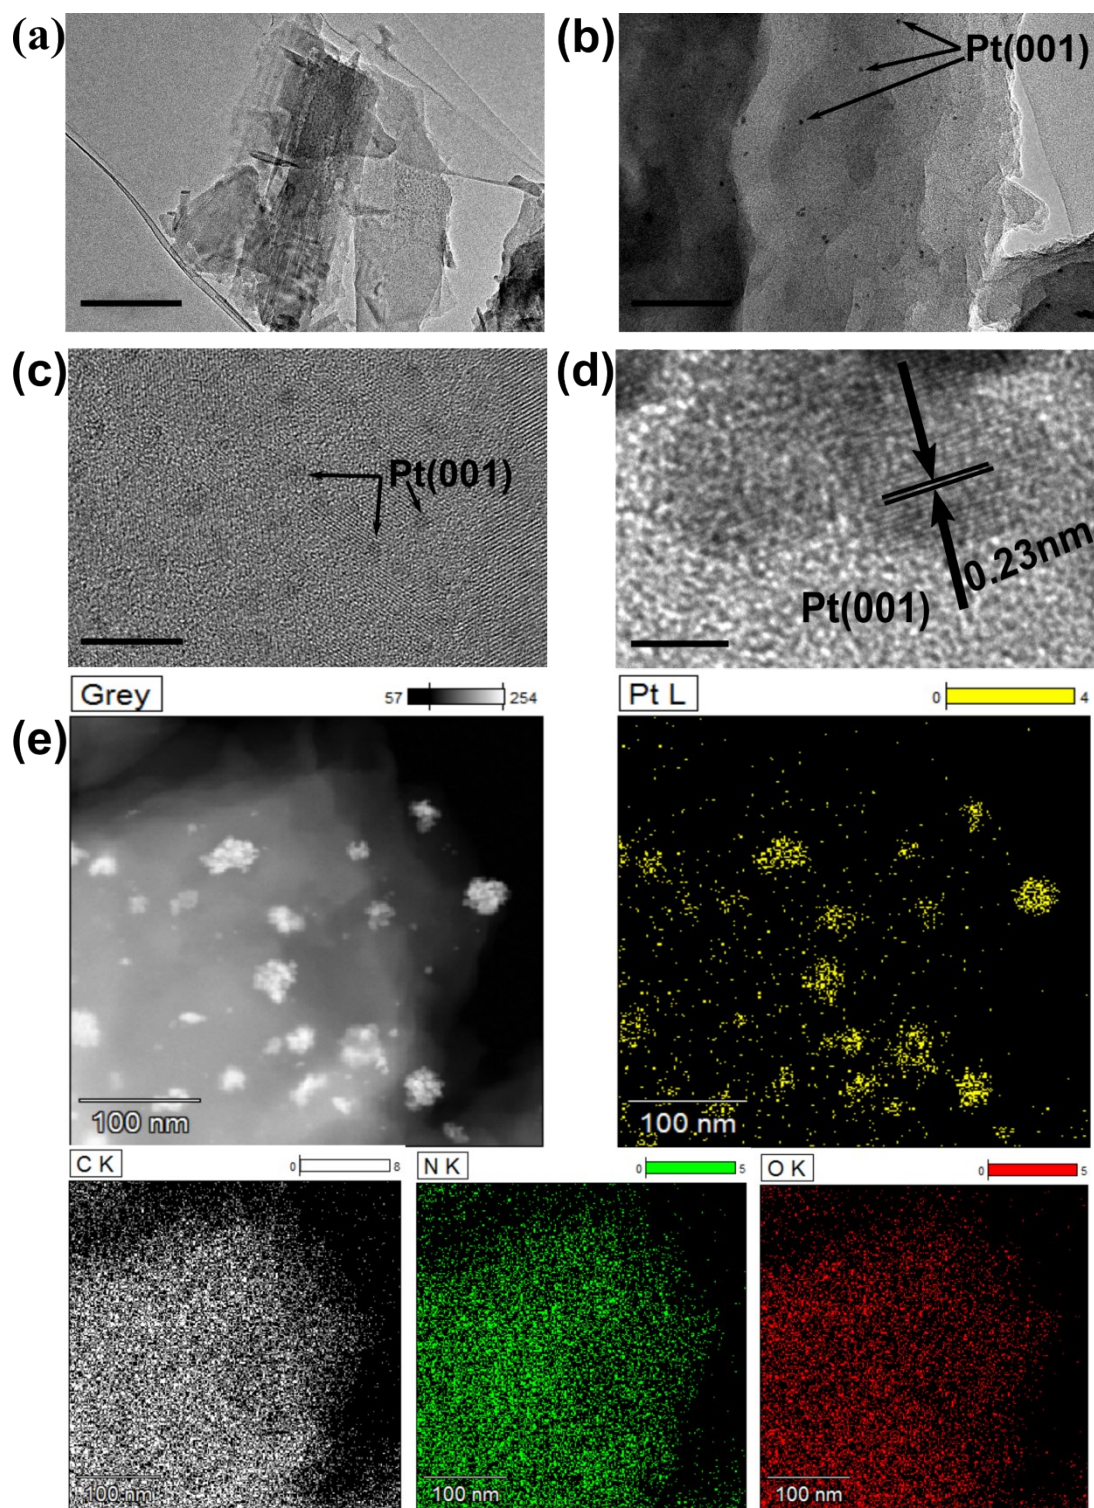

**Figure S13** TEM images of 6DEPI-Pt. (a) scale bar: 100 nm, (b) scale bar: 50 nm, (c) scale bar: 5 nm, (d) scale bar: 2 nm. (e) EDS images of 6DEPI-Pt. The mass ratios of Pt was 3 wt%.

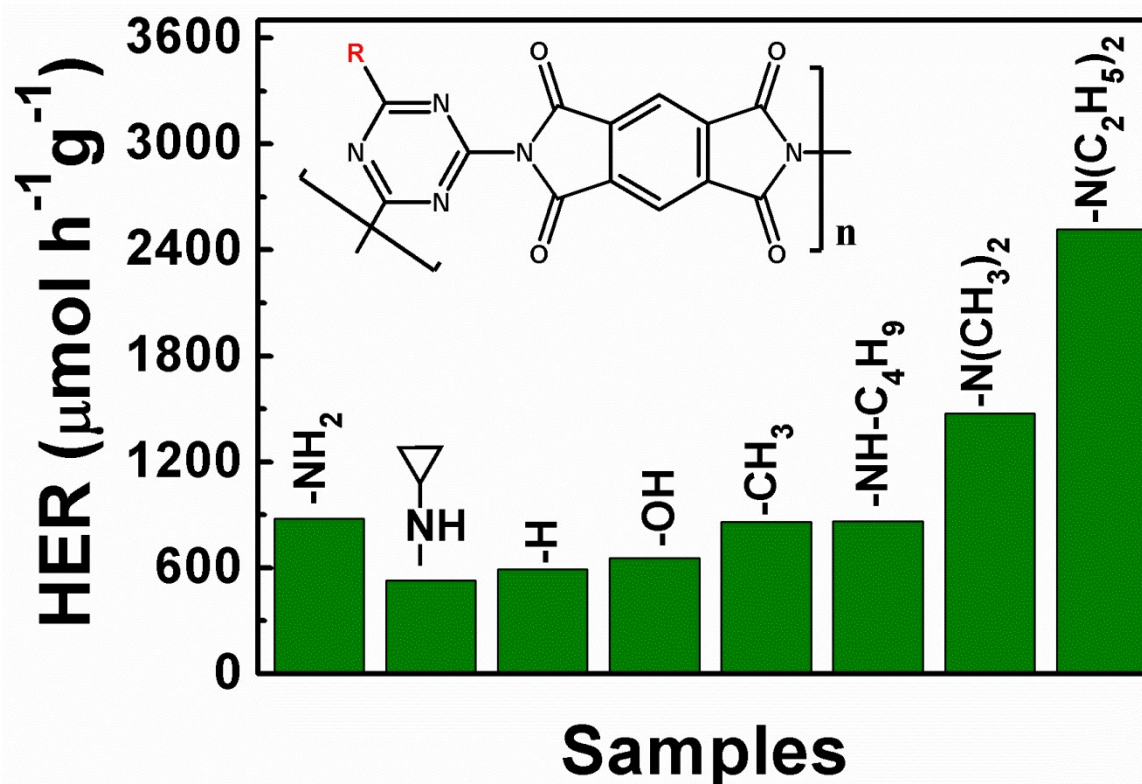

Figure S14 HER of different PI-based photocatalysts.

Table S3 Hydrogen evolution rate (HER) comparison of PI-based photocatalysts.

| Reference | photocatalysts | HER ( $\mu\text{mol h}^{-1} \text{g}^{-1}$ ) | Regulation Method                            | Experimental Conditions ( $\lambda > 420 \text{ nm}$ )         |
|-----------|----------------|----------------------------------------------|----------------------------------------------|----------------------------------------------------------------|
| This work | 6DEPI          | 2516 (initial)<br>3812 (for the 2nd run)     | Linear PI through solvothermal synthesis     | TEOA as a sacrificial reagent and 3 wt% Pt as a cocatalyst     |
| S1        | PI             | 35                                           | direct heating the mixture of Melem and PMDA | methanol as a sacrificial reagent and 1 wt% Pt as a cocatalyst |

|    |                  |      |                                                   |                                                                                      |
|----|------------------|------|---------------------------------------------------|--------------------------------------------------------------------------------------|
| S2 | PI               | 103  | direct heating the mixture of Melem and PMDA      | methanol as a sacrificial reagent and 1 wt% Pt as a cocatalyst                       |
| S3 | PI-1             | 65   | direct heating the mixture of Melem and PMDA      | methanol as a sacrificial reagent and 1 wt% Pt as a cocatalyst                       |
| S3 | PI-2             | 6    | direct heating the mixture of Melem and BPDA      | methanol as a sacrificial reagent and 1 wt% Pt as a cocatalyst                       |
| S3 | PI-3             | 6.5  | direct heating the mixture of Melem and NTDA      | methanol as a sacrificial reagent and 1 wt% Pt as a cocatalyst                       |
| S4 | PI-325           | 76   | direct heating the mixture of Melem and PMDA      | methanol as a sacrificial reagent and 1 wt% Pt as a cocatalyst                       |
| S5 | PI-SM-180        | 1640 | Melem and PDMA through solvothermal synthesis     | methanol as a sacrificial reagent and 3 wt% Pt as a cocatalyst ( $\lambda > 300$ nm) |
| S6 | PI-DMF           | 120  | Melem and PDMA through solvothermal synthesis     | methanol as a sacrificial reagent and 3 wt% Pt as a cocatalyst ( $\lambda > 300$ nm) |
| S7 | MPI <sub>7</sub> | 184  | Melem and PDMA through MW-assisted heating method | TEOA as a sacrificial reagent and 0.5 wt% Pt as a cocatalyst                         |

|     |                              |       |                                                                                    |                                   |
|-----|------------------------------|-------|------------------------------------------------------------------------------------|-----------------------------------|
| S8  | PI/Ag aerogel photocatalysts | 166.1 | ODA and PBDA through sol-gel method                                                | methanol as a sacrificial reagent |
| S9  | MQDs/PI                      | 630   | MoS <sub>2</sub> quantum dots heterojunction through immersion-hydrothermal method | methanol as a sacrificial reagent |
| S10 | CdS/PI                       | 613   | CdS/PI heterojunction through solvothermal method                                  | methanol as a sacrificial reagent |

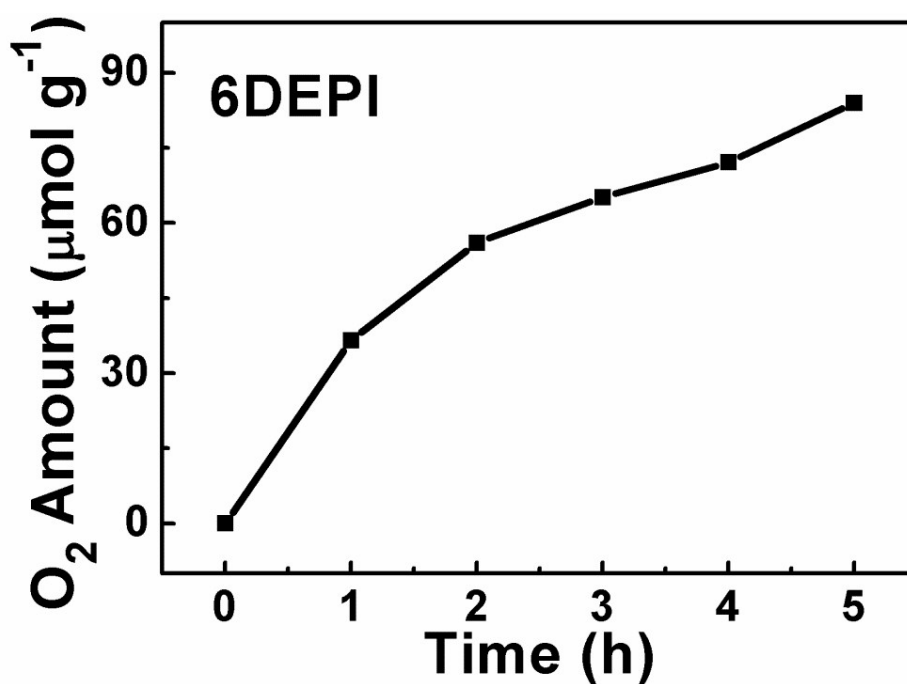

Figure S15 The photocatalytic oxygen evolution with 6DEPI

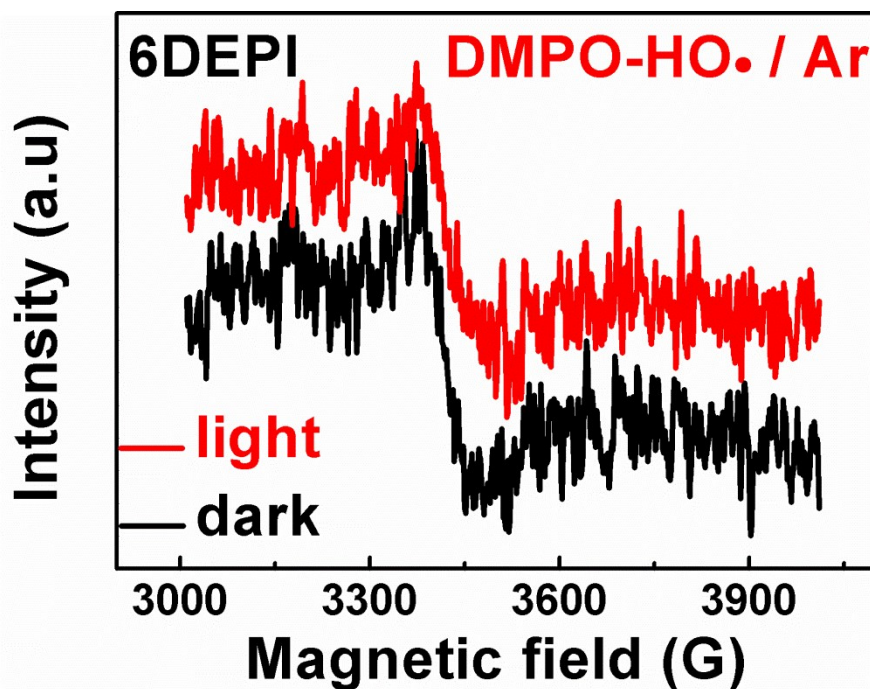

**Figure S16** Under Ar atmosphere, DMPO spin-trapping ESR spectra for DMPO-HO• produced by 6DEPI in water with visible light irradiation time of 6 min. The result indicated that no HO• was generated under visible light irradiation.

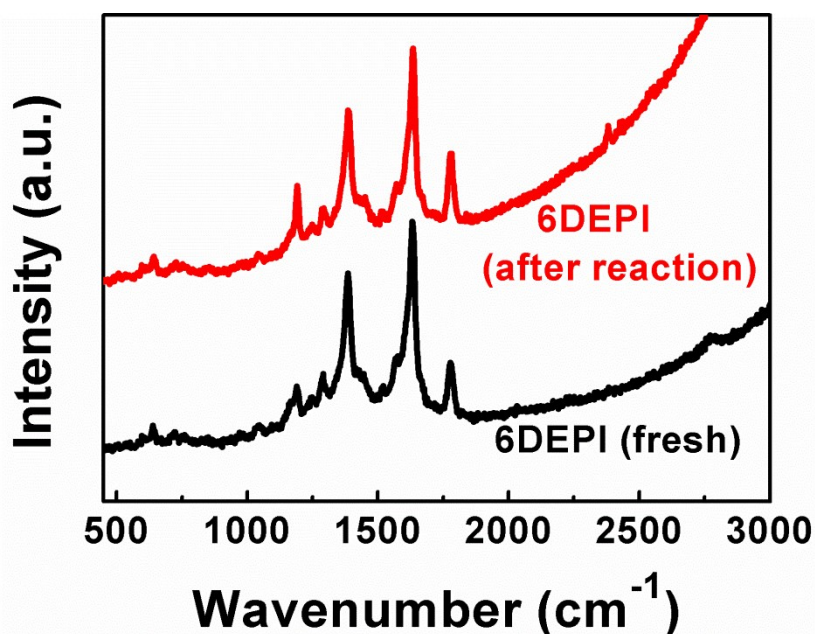

**Figure S17** The Raman spectra of 6DEPI before and after H<sub>2</sub>O<sub>2</sub> evolution.

**References of supporting Information :**

1. S. Chu, Y. Wang, Y. Guo, P. Zhou, H. Yu, L. Luo, F. Kong and Z. Zou, *J. Mater. Chem.*, 2012, **22**.

- 
2. S. Chu, Y. Wang, Y. Guo, J. Feng, C. Wang, W. Luo, X. Fan and Z. Zou, *ACS Catal.*, 2013, **3**, 912-919.
  3. S. Chu, C. Wang, J. Feng, Y. Wang and Z. Zou, *Int. J. Hydrogen Energy*, 2014, **39**, 13519-13526.
  4. S. Chu, Y. Wang, C. Wang, J. Yang and Z. Zou, *Int. J. Hydrogen Energy*, 2013, **38**, 10768-10772.
  5. J. Zhou, Y. Lei, C. Ma, W. Lv, N. Li, Y. Wang, H. Xu and Z. Zou, *Chem. Commun.*, 2017, **53**, 10536-10539.
  6. J. Zhou, Y. Wang, X. Hao, C. Ma, Y. Wang and Z. Zou, *J. Phys. Chem. C*, 2018, **122**, 1037-1043.
  7. L. Lin, P. Ye, C. Cao, Q. Jin, G.-S. Xu, Y.-H. Shen and Y.-P. Yuan, *J. Mater. Chem. A*, 2015, **3**, 10205-10208.
  8. X. Zhao, X. Yi, X. Wang, W. Chu, S. Guo, J. Zhang, B. Liu and X. Liu, *Appl. Surf. Sci.*, 2020, **502**, 144187.
  9. C. Ma, H. Zhu, J. Zhou, Z. Cui, T. Liu, Y. Wang, Y. Wang and Z. Zou, *Dalton Transactions*, 2017, **46**, 3877-3886.
  10. Y. Hu, X. Hao, Z. Cui, J. Zhou, S. Chu, Y. Wang and Z. Zou, *Appl. Catal., B*, 2020, **260**, 118131.
-
